# Supplementary material for: Comparison of probabilistic post-processing approaches for improving NWP-based daily and weekly reference evapotranspiration forecasts
Source: Copernicus journal article supplement (doi:10.5194/hess-2019-369), 2019-08-12
Supplement: Supplementary file [file hess-2019-369-RC1-supplement.pdf]

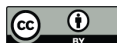

# 1 Comparison of probabilistic post-processing approaches for 2 improving NWP-based daily and weekly reference evapotranspiration 3 forecasts

4 Hanoi Medina, Di Tian

5 Department of Crop, Soil, and Environmental Sciences, Auburn University, Auburn, AL 36849

6 Correspondence to: Di Tian ([tiandi@auburn.edu](mailto:tiandi@auburn.edu))

7 **Abstract:** Reference evapotranspiration (ET<sub>o</sub>) forecasts play an important role in agricultural, environmental, and water  
8 management. This study evaluated probabilistic post-processing approaches, including the nonhomogeneous Gaussian  
9 regression (NGR), affine kernel dressing (AKD), and Bayesian model averaging (BMA) techniques, for improving daily and  
10 weekly ET<sub>o</sub> forecasting based on single or multiple numerical weather predictions (NWP) from The International Grand  
11 Global Ensemble (TIGGE), including the European Centre for Medium-Range Weather Forecasts (ECMWF), the National  
12 Centers for Environmental Prediction Global Forecast System (NCEP), and the United Kingdom Meteorological Office  
13 forecasts (UKMO). We found that the NGR, the AKD and the BMA methods greatly improved the skill and reliability of the  
14 ET<sub>o</sub> forecasts compared to a linear regression bias correction method, due to the considerable adjustments on the spread of  
15 ensemble forecasts. The methods were especially effective when applied over the weekly NCEP forecasts, followed by UKMO  
16 forecasts. The post-processed weekly forecasts had much lower rRMSE (between 8-11%) than the persistence-based weekly  
17 forecasts (22%), and the post-processed daily forecasts (13-20%). Compared with the single model ET<sub>o</sub> forecasts based on  
18 ECMWF, multi-model ensemble ET<sub>o</sub> forecasts showed higher skill at short lead times (1 or 2 days) and over the southern and  
19 western regions of the United States. The improvement was higher at the daily timescale than at the weekly timescale. The  
20 NGR and AKD methods performed the best, but the NGR method is more simple and computationally efficient than the other  
21 methods. In summary, the study demonstrated that the three probabilistic approaches generally outperform conventional  
22 procedures based on the simple bias correction of single model forecasts, with the NGR post-processing of the ECMWF and  
23 ECMWF-UKMO forecasts providing the most efficient ET<sub>o</sub> forecasting.

## 24 1. Introduction

25 Reference crop evapotranspiration (ET<sub>o</sub>) represents the weather driven component of the water transfer from plants and soils  
26 to the atmosphere. It plays a fundamental role in estimating mass and energy balance over land surface as well as in agronomic,  
27 forestry, and water resources management. In particular, ET<sub>o</sub> forecasting is important for aiding water management decision  
28 making (such as irrigation scheduling, reservoir operation, etc.) under uncertainty by identifying the range of future plausible  
29 water stress and demand. However, ET<sub>o</sub> forecasting is highly uncertain due to the chaotic nature of weather systems. In



30 addition, ETo estimation requires full sets of meteorological data which is usually not easy to obtain. Due to the improvement  
31 of numerical weather predictions (NWP), studies have been recently emerged to forecast ETo using outputs of NWP over  
32 different regions of the world (Silva et al., 2010; Tian and Martinez, 2012 a, 2012b, and 2014; Perera et al., 2014; Pelosi et al.,  
33 2016; Chirico et al., 2018; Medina et al., 2018). Operationally, experimental ETo forecast products are being developed, such  
34 as Forecast Reference EvapoTranspiration (FRET) product (<https://digital.weather.gov/>), as part of the U.S. National Weather  
35 Service (NWS) National Digital Forecast Database (NDFD) (Glahn and Ruth, 2003), and the Australian Bureau of  
36 Meteorology's Water and Land website (<http://www.bom.gov.au/watl/>), which provides current and forecasted ETo at the  
37 continental scale.

38 The improved performance of NWP during recent years is largely due to the improvement of physical, statistical  
39 representations of the major processes in the models, and the use of ensemble forecasting (Hamill et al., 2013, Bauer et al.,  
40 2015). Nevertheless, the NWP forecasts still commonly show systematic inconsistencies with measurements, which are often  
41 caused by inherent errors of NWP or local land-atmospheric variability which is not well resolved in the models. Post-  
42 processing methods, defined as any form of adjustment to the model outputs in order to get better predictions (eg., Hagedorn  
43 et al., 2012), is highly recommended to attenuate, or even eliminate, those inconsistencies (Gneiting et al., 2005; Raftery et  
44 al., 2005). However, most post-processing procedures only considered single-model predictions (i.e., predictions generated by  
45 a single NWP model), and addressed errors in the mean of the forecast distribution while ignored those in the forecast variance  
46 (Gneiting, 2014). These procedures regularly adopted some form of model output statistics (MOS, Glahn and Lowry, 1972;  
47 Klein and Glahn, 1974) methods, focusing on correcting current ensemble forecasts based on the bias in the historical forecasts.  
48 As no forecast is complete without an accurate description of its uncertainty (National Research Council of the National  
49 Academies 2006), the dispersion of the forecast ensemble often misrepresent the true density distribution of the forecast  
50 uncertainty (Krzysztofowicz 2001; Smith 2001; Hansen 2002). The ensemble forecasts are, for example, commonly under-  
51 dispersed (e.g. Buizza et al. 2005; Leutbecher and Palmer, 2008), which make the probabilistic predictions overconfident  
52 (Wilks 2011). Therefore, a new generation of probabilistic techniques has been proposed to also address dispersion errors of  
53 the ensembles (Hamill and Colucci 1997; Buizza et al., 2005, Pelosi et al., 2017), in some cases through the manipulation of  
54 multi-model weather forecasts. The nonhomogeneous Gaussian regression (NGR, Gneiting et al., 2005), the Bayesian model  
55 averaging, (BMA, Raftery et al., 2005; Fraley et al., 2010) and the family of kernel dressing (Roulston and Smith 2003; Wang  
56 and Bishop 2005), such as the affine kernel dressing (AKD, Brocker and Smith 2008), are emerging probabilistic techniques  
57 (Gneiting, 2014), with the NGR and the BMA methods being especially designed for multi-model post-processing.

58 Studies suggest that the post-processing of NWP-based ETo forecasts are crucial for informing decision making (e.g. Ishak et  
59 al., 2010). Medina et al. (2018) compared single and multi-model NWP-based ETo forecasts and the results showed that the  
60 performance of the multi-model ensemble ETo forecasts considerably improved through a simple bias-correction post-  
61 processing, and that the bias-corrected multi-model forecasts were in general better than the single model forecasts. In reality,  
62 while most applications for the ETo forecasting have involved some form of post-processing, these have been often limited to  
63 simple MOS procedures of single-model ensembles (e.g., Silva et al., 2010; Perera et al., 2014). Poor treatments of uncertainty



64 and variability is considered as a main issue affecting users' perceptions and adoptions of weather forecasts (Mase and  
65 Prokopy, 2014). The appropriate representation of the second and higher moments of the ETo forecast probability density is  
66 especially important to predict extreme values. Therefore, the use of probabilistic post-processing techniques such as the NGR,  
67 the AKD and BMA, may greatly enhance the overall performance of the ETo forecasts compared to the simple MOS  
68 procedures.

69 Only a few studies have considered probabilistic methods for post-processing ETo forecasts. These include the works of Tian  
70 and Martinez (2012a, 2012b, and 2014), and more recently Zhao et al (2019). The former authors showed the Analog Forecast  
71 (AF) method to be useful for the post-processing ETo forecasts based on Global Forecast System (GFS, Hamill et al., 2006)  
72 and Global Ensemble Forecast System (GEFS, Hamill et al., 2013) reforecasts. Tian and Martinez (2014) found that water  
73 deficit forecasts produced with the post-processed ETo forecasts had higher accuracy than those produced with climatology.  
74 On other hand, Zhao et al. (2019) improved the skill and the reliability of the Australian BoM model using a Bayesian joint  
75 probability (BJP) post-processing approach, which is based on the parametric modelling of the joint probability distribution  
76 between forecast ensemble means and observations. However, a main disadvantage of both the AF and the BJP methods  
77 compared to the aforementioned emerging probabilistic approaches is that, while they transform the spread of the ensembles,  
78 they rely on the mean of retrospective reforecasts, thus neglecting information about their dispersion. The AF approach also  
79 requires long time series of retrospective forecasts, and may be unsuitable for extreme events forecasting (e.g. Medina et al.,  
80 2019). The AKD, NGR and BMA methods produce continuous predictive density distributions, which may be useful for the  
81 decision making (Gneiting, 2014), and perform commonly well with relatively short training datasets (Geiting et al., 2005;  
82 Raftery et al., 2005; Wilks and Hamill, 2007). The use of novel forecasting strategies relying on the postprocessing of single  
83 and multi-model forecasts with these emerging probabilistic techniques provide good opportunities for improving the ETo  
84 predictions.

85 While ETo forecasts based on global medium range NWP have been mostly focused on the daily timescale (Perera et al., 2014;  
86 Silva et al., 2010; Tian and Martinez, 2012a, b, 2014; Medina et al., 2018), weekly ETo forecasts are also important for users.  
87 Studies show that both daily and weekly forecasts have increasing influence on the decision makers in agriculture (Prokopy et  
88 al., 2013; Mase and Prokopy, 2014) and water resource management (Hobbins et al., 2017). For example, irrigation is  
89 commonly scheduled considering both daily and weekly basis. While weekly evapotranspiration forecasts are useful for  
90 planning water allocation from reservoirs, especially in cases of shortages. Weekly ETo anomalies can also be useful to provide  
91 warnings of wild-fires (Castro et al., 2003) and evolving flash drought conditions (Hobbins et al., 2017). Therefore, accounting  
92 for the post-processing of both daily and weekly ETo predictions provides a more comprehensive view of the capabilities of  
93 these forecasting approaches than considering only daily predictions while better meets the user's actual needs.

94 In this paper, we are addressing several scientific questions which have not been adequately studied in previous literature,  
95 including, how effective are the new probabilistic post-processing methods compared with the traditional MOS bias correction  
96 methods for post-processing ETo forecasts? Is it worth implementing the probabilistic post-processing for multi-model rather  
97 than single-model ensemble forecasting? For the first time, this work aims to evaluate and compare multiple novel strategies



98 for post-processing both daily and weekly ETo forecasts using the ensemble probabilistic approaches. The study represents a  
99 major step forward with respect to Medina et al. (2018), which evaluated the performance of raw and linear regression bias  
100 corrected daily ETo forecasts produced with single and multi-model forecasts. It provides a broad characterization of the  
101 performance for different probabilistic post-processing strategies but also diagnoses the causes of high and low performance.

## 102 2 Methods and Datasets

### 103 2.1 The probabilistic methods

104 The NGR, AKD and BMA techniques follow a common strategy: they yield a predictive probability density function (PDF)  
105 of the post-processed forecasts  $y$  given the raw forecasts  $x$  and some fitting parameters  $\theta$  ( $p(y|x, \theta)$ ). The parameters  $\theta$  are  
106 fitted using a training dataset of ensemble forecasts and observations, as in the MOS techniques. Below is a brief description  
107 of each technique.

#### 108 2.1.1 Non-Homogeneous Gaussian Regression

109 The NGR (Gneiting et al., 2005) produces a Gaussian predictive (PDF) based on the current ensemble (of typically multi-  
110 model) forecasts. If  $x_{ij}$  denote the  $j^{\text{th}}$  ( $j = 1, \dots, m_i$ ) ensemble forecast member of model  $i$  ( $i = 1, \dots, n$ ), then  
111  $p(y|x, \theta) \sim \mathcal{N}(\mu, v)$ , where the mean:

$$112 \mu = a + \sum_{i=1}^n b_i \bar{x}_i \quad (1)$$

113 is a linear combination of the mean ensemble forecasts  $\bar{x}_i$  and the variance:

$$114 v = c + dS^2 \quad (2)$$

115 is a linear function of the ensemble variance  $S^2$ . The fitting parameters  $a$ ,  $b_i$ ,  $c$  and  $d$  are determined by minimizing the  
116 continuous rank probability score (CRPS) using the training set of forecasts and observations. Notice that parameters  $a$ ,  $c$  and  
117  $d$  are indistinguishable among exchangeable members; therefore the  $b_i$  can be seen as a weighting parameters that reflect the  
118 better or worse performance of one model compared to the others. The NGR technique is implemented in R (R Core Team)  
119 using the packages ensembleMOS (Yuen et al., 2018),

#### 120 2.1.2. Affine Kernel Dressing

121 The affine kernel dressing method (Bröcker and Smith, 2008) only considers single model ensemble forecasts. It  
122 estimates  $p(y|x, \theta)$  using a mixture of normally distributed variables:

$$123 p(y|x, \theta) = \frac{1}{m\sigma} \sum_{j=1}^m K\left(\frac{y-z_j}{\sigma}\right) \quad (3)$$

124 where  $K$  represents a standard normal density kernel ( $K(\xi) = 1/\sqrt{2\pi} \exp(-1/2\xi^2)$ ), centered at  $z_j$ , such that:

$$125 z_j = ax_j + r_1 + r_2\bar{x} \quad (4)$$

126 and,

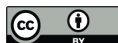

127  $\sigma^2 = h_s^2(s_1 + s_2 u(\mathbf{z}))$  (5)

128 where  $h_s$  is the Silversman's factor (Bröcker and Smith, 2008),  $u(\mathbf{z})$  is the variance of  $\mathbf{z}$  and  $a, r_1, r_2, s_1, s_2$  are fitting  
129 parameters obtained by minimizing the mean Ignorance score. For clarity we use the same nomenclature for the parameters as  
130 in the original study. From Eqs. 4 and 5 we can obtain that the predictive variance  $v$  is a function of the ensemble variance  $S^2$   
131 (Brocker and Smith, 2008):

132  $v = h_s^2 s_1 + a^2(1 + h_s^2 s_2) S^2 = c^* + d^* S^2$  (6)

133 Here,  $S^2$  represents the variance of the ensemble of exchangeable members.

134 The AKD technique is implemented through the SpecsVerification R package (Siegert, 2017).

### 135 2.1.3 Bayesian Model Averaging

136 The BMA method (Raftery et al. 2005, Fraley et al., 2010) also produces a mixture of normally distributed variables, as the  
137 AKD method, but based on multi-model forecasts. In this case the predictive PDF is given by a weighted sum of component  
138 PDFs,  $g_i(y|x_{i,j}; \theta_i)$ , one per each member:

139  $p(y|x, \theta) = \sum_{i=1}^n \sum_{j=1}^{m_i} w_i g_i(y|x_{i,j}, \theta_i)$  (7)

140 such  weights and the parameters are invariable among members of the same model and

144  $\sum_{i=1}^n m_i w_i = 1$

141 In the study the component PDFs are assumed normal as for the affine kernel dressing method. Estimates of  $w_i$ s and  $\theta_i$ s are  
142 produced by maximizing the likelihood function using an Expectation Maximization algorithm (Casella and Berger, 2002).

143 The BMA technique is implemented through the ensembleBMA R package (Fraley et al., 2016).

### 145 2.2 Measurement and forecast datasets

146 ETo observations and forecasts were computed with the FAO-56 PM equation (Allen et al., 1998), from daily meteorological  
147 data as inputs. They covered the same period, between May and August from 2014 to 2016. The observations used daily  
148 measurements of minimum and maximum temperature, minimum and maximum relative humidity, wind speed, and surface  
149 incoming solar radiation from 101 U.S. Climate Reference Network (USCRN) weather stations. The USCRN stations are  
150 distributed over nine climatologically consistent regions in CONUS (Fig. 1). The ETo forecasts used daily maximum and  
151 minimum temperature, solar radiation, wind speed, and dew point temperature reforecasts of European Centre for Medium-  
152 Range Weather Forecasts model (ECMWF) outputs, United Kingdom Meteorological office model (KMO) outputs, and  
153 National Centers for Environmental Prediction model (NCEP) from The International Grand Global Ensemble (TIGGE;  
154 Swinbank et al. 2016) database at each of these stations, considering a maximum lead time of 7 days. The weekly forecasts  
155 accounted for the sum of the daily predictions generated a specific day of each week, and the weekly observations considered  
156 the sum of the daily observations over the corresponding forecasting days, such that the weekly observations were independent 



157 each other. In the study, we used the nearest neighbor approach to interpolate the forecasts to the USCRN stations, which does  
158 not account for the effects of elevation. While the use of interpolation techniques considering the effects of elevation (e.g. van  
159 Osnabrugge et al., 2019) may correct part of the forecasts errors before the post-processing, it could also affect the multivariate  
160 dependence of the weather variables. Hagedorn et al. (2012) showed that the post-processing can not only address the  
161 discrepancies related to the model's spatial resolution, but also serve as a means of downscaling the forecasts.

## 162 2.3 Post-processing schemes

### 163 2.3.1 Training and verification periods

164 The training data for the daily post-processing comprised the pairs of daily forecasts and observations corresponding from  
165 30 days prior to the forecast initial day, as in Medina et al. (2018). Instead, the training data for the weekly post-processing  
166 comprised all the other pairs of weekly forecasts and observations available for the forecast location, similarly as in the  
167 case of a leave one out cross validation framework. In the study both the daily and weekly forecasts were verified for events  
168 over June-August, 2014-2016.

### 169 2.3.2 Baseline approaches

170 Linear regression bias correction (BC) of the ECMWF forecast was used as a baseline approach for measuring the effectiveness  
171 of the NGR, the AKD and the BMA methods considering both daily and weekly forecasts. Here, the current forecasts bias is  
172 estimated as a linear function of the forecasts mean, and the members of the ensemble are shifted accordingly. The function is  
173 calibrated using the forecasts mean and the actual biases from a retrospective set of forecasts and observations. Persistence is  
174 also used as a baseline approach for weekly forecasts, considering its applicability in productive systems. In this case the ETo  
175 for a current week is estimated as the observed ETo during the previous week.

### 176 2.3.3 Forecasting Experiments

177 Table 1 summarizes the daily and weekly NWP-based ETo forecasting experiments based on different post-processing  
178 methods and model combinations. The analyses of the daily forecasts make more emphasis on the differences among post-  
179 processing methods. They include an examination of the effect of the duration of the training period on the forecasts  
180 assessments as well as the regression weights from the tested post-processing methods. Whereas, the weekly forecasts make  
181 more emphasis on the differences among the several single and multi-model ETo forecasts under baseline and probabilistic  
182 post-processing.

## 183 2.4 Forecast verification metrics

184 In this study we use several metrics to evaluate deterministic and probabilistic forecast performance of the post-processed ETo  
185 forecasts. For consistency purposes, the metrics of the tested methods were assessed using 50 random samples, i.e., same



186 number as members in the bias corrected ECMWF forecasts. Deterministic ETo forecast was produced by taking the average  
187 of the ensemble members. The deterministic forecast performance was assessed using the bias or mean error, the root mean  
188 square error (RMSE) and the correlation ( $\rho$ ), which are common measures of agreement in many studies. Both the relative and  
189 the absolute bias and RMSE are calculated and reported.

190 The probabilistic forecast performance was assessed using the spread-skill relationship (see Wilks, 2011) and the forecast  
191 coverage as measures of the forecast reliability, and the Brier Skill Score as a measure of the skill. Reliability here  
192 refers to the statistical consistency (as in Toth et al. 2003), which is met when the observations are statistically indistinguishable  
193 from the forecast ensembles (Wilks, 2011). The spread-skill relationships are represented as binned-type plots (e.g. Gosi et  
194 al., 2017), accounting for the mean of the ensemble standard deviation deciles (as an indication of the ensemble spread) against  
195 the mean RMSE of the forecasts in each decile over the verification period. The plots include the correlation between these  
196 two quantities. Calibrated ensembles should show a 1:1 relationship between the standard deviations and the RMSE. If the  
197 forecasts are unbiased and the spread is small compared to the RMSE, then the ensembles tend to be under-dispersive. The  
198 inverse of the spread provides an indication of sharpness, which is the level of “compactness” of the ensemble (Wilks, 2011).  
199 In addition to the spread skill relationship, we also report the ratio between the observed and nominal coverage (hereinafter  
200 referred as coverage ratio). The coverage of a  $(1 - \alpha)100\%$ ,  $\alpha \in (0, 1)$ , central prediction interval is the fraction of  
201 observations from the verification data set lying between  $\alpha/2$  and  $1 - \alpha/2$  quantiles of the predictive distribution. It is  
202 empirically assessed by considering the observations lying between the extreme values of the ensembles. The nominal or  
203 theoretical coverage of a calibrated predictive distribution is  $(1 - \alpha)100\%$ . A calibrated forecast of  $m$  ensemble members  
204 provides a nominal coverage of about  $(m - 1)/(m + 1)100\%$  central prediction interval (e.g., Beran and Hall, 1993). For  
205 example, an ensemble of 50 members provides 96% central prediction interval. The ratio between the observed and nominal  
206 coverages provides a quantitative indicator of the quality of the forecasts dispersion under unbiasedness: a ratio lower (larger)  
207 than 1 suggest that the forecasts tend to be under (over) dispersive. Finally, the BSS represents a traditional skill-score  
208 relationship that adopts the Brier score (Wilks, 2011), as the accuracy measure. In this study we compute the BSS associated  
209 to the tercile events of the ETo forecasts (upper or 1st, middle or 2nd, and lower or 3rd terciles), exactly as in Medina et al.  
210 (2018).

## 211 3 Results

### 212 3.1 Comparing the NGR, AKD and BMA methods at daily scale

#### 213 3.1.1 Deterministic forecast performance

214 Figure 2 shows the relative bias and RMSE as well as the correlation of the forecasts post-processed using different approaches  
215 over the southeast (SE) and northwest (NW) regions. In general, the probabilistic post-processing methods add no additional  
216 skill to the deterministic forecast performance compared to the simple bias correction. While the RMSE are relatively high,





217 the bias is very low, which indicates that the errors are mostly random. The BMA and the simple linear regression methods  
218 provided lower bias than the NGR and AKD methods. Instead, the BMA method provided higher RMSE and lower correlations  
219 than the other three methods at long lead times.

### 220 3.1.2 Probabilistic forecast performance

221 The spread-skill relationship in Figure 3 shows that the probabilistic post-processing methods considerably improved the  
222 reliability of the ETo forecasts compared with the linear regression bias correction (Figure 3). The former methods tend to  
223 correct evident shortcomings of the ensemble raw forecasts which are unresolved by the simple post-processing, i.e., the  
224 consider under-dispersion at short lead times, and the poor consistency between the ensemble spread and the RMSE at  
225 longer lead times. The adjustments had a low cost in terms of sharpness, judging by the range of ensemble spreads for the  
226 different line plots, but seemed slightly insufficient. The correlations between the ensemble standard deviation and the RMSE  
227 are fairly low, suggesting a limited predictive ability of the spread (Wilks, 2011). Nonetheless, they were consistently higher  
228 for probabilistic post-processing methods, compared to the linear regression method, and at short lead times, compared to the  
229 long lead times. The performance was low sensitive to the type of probabilistic post-processing, independent of the single or  
230 multi-model forecasts strategy, although the BMA post-processing provided slightly lower correlations, especially for longer  
231 lead times. The coverage ratios in table 2 provide quantitative insights about the forecasts under-dispersion for the different  
232 strategies. The simple bias corrected ECMWF forecasts provided a mean coverage ratio of 77%, but it can be as low as the  
233 50%. The other forecasts provided coverage ratios of over 91%. The ratios were slightly better (i.e., closer to one) using the  
234 BMA method than with the NGR and the AKD methods, and using single ECMWF forecasts than with the ECMWF- UKMO  
235 and the ECMWF-NCEP- UKMO forecasts.

236 The NGR and AFK methods provided better Brier skill score (BSS) than the BC method for the three categories of ETo values,  
237 with improvements being higher for the middle tercile, than for the lower and upper terciles (Figure 4). The BMA based skill  
238 scores tended to decrease with lead time. On west regions (SW, W, NW) and at short lead days the multi-model forecasts  
239 post-processed with the NGR were the most skillful; in the other cases the ECMWF forecasts post-processed with the NGR  
240 and the AKD methods tended to be best.

### 241 3.1.3 Summary of average performance for daily forecast

242 Table 3 shows the average performance for the lead days 1 and 7, by weighting the values of each metric according to the  
243 number of stations in each region. The ECMWF- UKMO forecasts post-processed with the NGR method were best at short  
244 lead times (1-2 days), while the ECMWF forecasts post-processed with the AKD and the NGR methods were the first and  
245 second best at the longer lead times. The BMA method performed well at short lead times but poorly at long times, while the  
246 simple bias correction method performed well for deterministic forecasts, but poorly for the probabilistic forecasts. The  
247 forecast performance across climate regions is also associated with the choice of the ECMWF forecasts or the multi-model  
248 forecasts (Table 4). The single model ECMWF forecasts performed better over northern climate regions than the multi-model





249 ensemble forecasts, while the multi-model did better than any single model forecast over the western regions. The performance  
250 over the other regions was more variable among strategies. The performance of the ECMWF- UKMO forecasts was generally  
251 better than that of the ECMWF-NCEP- UKMO forecasts (see Table 4, and Figs. 2 and 4). Unlike other performance metrics,  
252 the coverage was mostly better for the ECMWF forecasts than for the multi-model forecasts.

### 253 3.1.3 Effect of the length of training period

254 The choice of an “optimum” training period is an important issue related to the operational use of post-processing techniques  
255 for ETo forecasts. Here we compared the performance of different forecasts post-processed with NGR and AKD techniques  
256 using 45 and 30 training days. The results suggest that the payoff from using 45 days is practically minimal. Table 5 shows  
257 the percentage differences the forecasting performance of using 45 and 30 training days for post-processing. While there are  
258 generally some minor improvements for using 45 days than 30 days, which tend to be higher at longer lead times than shorter  
259 times, these improvements usually represent less than 3 percent of original statistics. The largest percentage difference,  
260 accounting for the BSS at the middle tercile, actually represented a negligible gain in absolute terms since they were affected  
261 by the close-to-zero range of the variable. The improvements were a bit higher for multi-model forecasts than for single model  
262 forecasts.

### 263 3.1.4 Weighting coefficients

264 The weighting coefficients reflect both the performance of the ensemble models and the performance the post-processing  
265 techniques relative to their counterparts. Figure 5 shows the mean  $b_i$  (Eq. 1) weighting coefficients of the NGR technique and  
266  $w_i$  (Eq. 7) weighting coefficient of the BMA techniques for each region and lead time for the post-processed ECMWF-NCEP-  
267 UKMO, respectively. The coefficients for the NGR and BMA techniques exhibited some common patterns of variability across  
268 regions and lead times. Both methods show that the weights of the ECMWF forecasts are at overall the highest, with a clear  
269 maximum at medium lead times; the weights of the UKMO model are the highest at 1 and 2 days, but sharply decreases with  
270 the lead time, while the weights of the NCEP model are in general the lowest, although they consistently increase with  
271 lead time. It explains well the most outstanding features of the performance assessments, in relation to the role of each model,  
272 and the dependence on regions and lead times. Compared to the NGR method, the BMA method gives the UKMO forecasts  
273 a higher relative weight, at the expense of the ECMWF forecast weights. For example, the weighting coefficients of the BMA  
274 method over the west regions are consistently higher for the UKMO forecasts than for the ECMWF forecasts. It suggests that  
275 the lower performance of the BMA post-processing relative to the NGR and the AKD methods may be related to a  
276 misrepresentation of the model weights performance. This in turn may be caused by convergence problems during the  
277 parameter optimization with the expectation-maximization algorithm (Vrugt et al., 2008).  
278 We observed considerable similarities on the distribution of variance coefficients for the NGR method (Eq. 2) and the AKD  
279 (Eq. 6) method after post-processing the ECMWF forecasts. The two methods also provide very similar adjustments on the  
280 mean forecast because, unlike the BMA method, they independently bias correct the mean and optimize the spread-skill

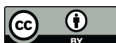

281 relationship, (Bröcker and Smith, 2008). However, the computing speed using the NGR method is about 60 times faster than  
282 using the AKD, which was perceived as the main drawback of the  method. The BMA method is also more  
283 computationally demanding than the NGR method but less than the AKD method. Considering the effectiveness,  
284 computational efficiency and versatility of the NGR method, we applied this probabilistic technique to weekly ETo forecasts  
285 based on single model and multi-model ensembles.

### 286 3.2 Assessing NGR methods for post-processing weekly ETo forecasts

#### 287 3.2.1 Deterministic forecast assessments

288 As for the daily predictions, the bias, the RMSE and the correlation of the weekly forecasts post-processed with the NGR  
289 method and the linear regression methods were similar (Fig. 6). However, while the RMSE of daily forecasts based on ECMWF  
290 model varies between 12 and 20 % of the total ETo (Fig. 2), the RMSE for any of weekly forecasting strategies commonly  
291 varies between 8 and 11%, which is lower than for daily forecasts, making it more useful for operational purpose. The post-  
292 processed forecasts showed much lower RMSE and twice higher correlation than the predictions based on persistence, with  
293 the weekly predictions based on ECMWF forecasts being generally better, followed by the predictions based on the UKMO  
294 forecasts.

#### 295 3.2.2 Probabilistic forecast assessments

296 Both the skill and the reliability of the weekly forecasts considerably improved through the NGR post-processing compared  
297 with the bias correction post-processing (Table 6). The improvements were different among ETo forecast models. In most  
298 cases, the better the forecasts performance, the lower the improvements are. The adjustments in the coverage ratio and the  
299 Brier skill score were about 2.5 and 5 times larger for the UKMO and the NCEP forecasts, respectively, than for the ECMWF  
300 forecasts. The bias corrected ECMWF forecasts are generally better than both the UKMO and NCEP forecasts post-processed  
301 with the NGR method. We found that the post-processing of the NCEP forecasts with methods like the NGR is almost  
302 mandatory to get reasonable probabilistic weekly forecasts.  example, the coverage ratio of the bias corrected forecasts on  
303 the West region was only 29%, because of the considerable under-dispersion. However, it is notable that, once they were post-  
304 processed with the NGR technique, they performed almost comparably to the UKMO forecasts post-processed with the same  
305 method.  Table 6 also shows that the multi-model ECMWF- UKMO weekly forecasts are commonly the best among all of  
306 those post-processed using the NGR method, followed by the ECMWF and the ECMWF-NCEP- UKMO forecasts.  
307 The improvements in the reliability came through substantial adjustments both in the ensemble spread and spread-skill  
308 relationship of the raw forecasts (Fig. 7). The correlations between the standard deviation of the ensembles and the RMSE  
309 were more than twice larger through the NGR post-processing than through the linear regression bias correction. The  
310 adjustments seemed even slightly more effective than those resulting from the probabilistic post-processing of the daily



311 forecasts (Fig. 3), although at the expense of a greater loss of sharpness. The contrasts in the post-processing effectiveness are  
312 probably associated with the differences in the training strategies.

313 In the case of the probabilistic forecast skill (Fig. 8), the improvements were larger for the middle tercile than for the other two  
314 terciles, similarly as with daily forecasts. Unlike the bias corrected forecasts, any of the probabilistically post-processed  
315 forecasts outperform climatology for practically any event at any region. Maybe more importantly, the skill for the lower  
316 and upper tercile events of the forecasts that have been post-processed with the NGR method is in most cases over 30% better  
317 than the skill of climatology. In the coast regions, from the South to the Northwest the skill is commonly over 50% better,  
318 similarly as for the daily forecasts. Finally, the improvements resulting from the use of multi-model forecasts compared to the  
319 single model forecasts were generally small, except for the Southwest region.

## 320 4. Discussion

### 321 4.1 Effects of probabilistic post-processing on ETo forecasting performance

322 This study showed that NGR, AKD and BMA post-processing schemes considerably improved the probabilistic forecast  
323 performance of the daily and weekly ETo forecasts compared with the simple bias correction method. While sharpness is a  
324 wished quality of any forecast, the daily and weekly bias corrected ETo forecasts from NWP are spuriously sharp, which leads  
325 to a poor consistency between the range of the ETo forecasts and the true values, and ultimately undermine the confidence on  
326 those forecasts. They also exhibit a poor consistency in that the variance of the ensembles are commonly insensitive to the  
327 size of the forecast error. The probabilistic post-processed methods provided a much better reliability, with a coverage which  
328 is close to the nominal value, and at a low cost on sharpness. Therefore, they lead to a much better agreement between the  
329 forecasted probability of having an ETo event between certain thresholds and the proportions of times that the event occurs (see  
330 Gneiting et al., 2005). In the case of the weekly ETo forecasts, the rate of the improvements are considerably smaller for the  
331 ECMWF forecasts, than for the UKMO, and especially the NCEP forecasts. The probabilistic post-processing of the weekly  
332 NCEP forecasts seemed practically mandatory to produce reasonable predictions, but once implemented it provided  
333 performance assessments almost comparable to those based on the UKMO forecasts. These results have important implications  
334 for operational ETo forecasts, such as the U.S. national digital forecast database, one of the few operational products of its  
335 type, which are based on the NCEP forecasts.

336 Unlike the probabilistic forecast metrics, the deterministic metrics (bias, RMSE and correlation) are low sensitive to the form  
337 (deterministic or probabilistic) of post-processing. In particular, the RMSE and correlation seemed more affected by the choice  
338 of the single or multi-model forecast strategy than the choice between the NGR, the AKD or the simple bias correction as post-  
339 processing method. Whereas, RMSE and correlation provided by the BMA method are consistently worse at long lead times.  
340 The daily errors under any post-processing were relatively large, but mostly random, and therefore tend to cancel out at weekly  
341 scales. Therefore, while the RMSE varied between 12% and 20% of the daily totals, it represented between 8% and 11% of  
342 the weekly totals. The RMSE for weekly ETo forecasts were in all cases more than 100% lower than for the persistence-based



343 ETo forecasts, and potentially more skillful than the forecasts that exploit the temporal autocorrelation of the ETo timeseries  
344 (e.g., Landaras et al., 2009; Mohan and Arumugam, 2009).

#### 345 4.2 Comparing the three probabilistic post-processing methods

346 The NGR and AKD based post-processing methods for the ECMWF forecasts produced comparable results, indicating that  
347 the simple Gaussian predictive distribution from the NGR method represents well the uncertainty of the ETo predictions. The  
348 methods led to similar distribution of the first two moments of the predictive probability function and similar performance  
349 statistics (with the AKD based forecasts being just slightly better). However, the NGR method requires less computing time  
350 and is more versatile since it can be applied to correct both single model and multi-model ensemble forecasts, while the AKD  
351 method can only be applied to correct single model forecast. The NGR based predictive distribution function is also easier to  
352 manipulate and interpret than the AKD based predictive distribution, which is given by an averaged sum of standard Gaussians.  
353 The BMA method performed slightly less desirable compared to the NGR and AKD presumably due to issues with the  
354 parameter identifiability. The implemented method uses the Expectation-Maximization (EM) algorithm to produce maximum  
355 likelihood estimates of the fitting coefficients, which is susceptible to converge to local minima, especially when dealing with  
356 multi-model forecasts with very different ensemble sizes (Vrugt et al., 2008). Archambeau et al. (2003) demonstrated that, in  
357 presence of outliers or repeated values, this algorithm tends to identify local maximums of the likelihood of the parameters of  
358 a Gaussian mixture model. Tian X. et al. (2012) found that adjusted BMA coefficients using both a quasi-Newtonian limited  
359 memory algorithm and the Markov Chain Monte Carlo were more accurate than those fitted with the EM algorithm.

#### 360 4.3 Multi-model ensemble versus single model forecasts

361 Daily multi-model ensemble forecasts performed better than daily ECMWF forecasts at short lead times (1-2 days) and over  
362 the western and southern regions, while the ECMWF forecasts are better over the northeastern regions for longer lead times.  
363 We observed similar patterns for the raw and simple bias corrected forecasts (Medina et al., 2018). Whether the effect of the  
364 multi-model forecast is generally inconsistent at weekly scales, seemingly due to the variable impact of the forecasting strategy  
365 with lead days. The observed behavior is associated with the performance of the ECMWF forecasts relative to the UKMO  
366 forecasts. While the ECMWF forecasts are in general better than the UKMO and NCEP forecasts, they are much better over  
367 the northeastern regions for medium lead times (4-6 days). The UKMO forecasts are in many cases the best at 1 and 2 lead  
368 days, but tend to be the worst at the longest times (6-7 days), especially over these regions. The NCEP forecasts had a small  
369 contribution with respect to the ECMWF and UKMO forecasts at short lead times. These forecasts are comparatively better  
370 at longer lead times, but still keep a minor role with regard to the ECMWF forecasts.  
371 When considering daily forecasts we adopted a length of the training period of 30 days and showed that by increasing the  
372 length to 45 days the improvements were small (commonly lower than three percent). This seems a plausible range for future  
373 works and represents an obvious advantage upon methods such as the analog forecast, which provide similar performance  
374 (Tian and Martinez 2012 a, b, 2014) but require long training datasets. Gneiting et al. (2005) and Wilson (2007) found that



375 lengths between 30 and 40 days provided good and almost constant performance assessments of sea level pressure forecasts  
376 post-processed with the NGR method, and temperatures forecasts post-processed with the BMA method, respectively.

#### 377 4.4. Future outlook

378 It is worth noting that, while the ETo forecasts are produced for being used in agriculture, they were tested over USCRN  
379 stations, which are not representative of agricultural settings. In real applications, the bias between the forecasts with no post-  
380 processing and the measurements based on agricultural stations could be higher than the bias resolved in this study. A question  
381 that should be addressed in the future studies is to what extent the improvements of the predictive distribution of the ETo  
382 forecasts can be translated into a more reliable representation of the crop water use in agricultural lands and, ultimately, in  
383 water savings and economic gains. Since the ETo estimations can have remarkable impacts on the soil moisture estimations  
384 (Rodriguez-Iturbe et al., 1999), we envision that new studies relying on the combination of rainfall and ETo forecasts post-  
385 processed with probabilistic methods will lead to considerable reductions on the uncertainty of soil moisture forecasts. New  
386 attempts should also investigate the role of the emerging probabilistic post-processing techniques on ETo forecasts produced  
387 from regional numerical weather prediction models, which have had improved spatial resolution and already been used in  
388 different meteorological services (e.g., Baldauf et al. 2011; Seity et al. 2011; Hong and Dudhia, 2012; Bentzien and Friederichs,  
389 2012).

#### 390 5. Conclusions

391 This study for the first time evaluated probabilistic methods based on NGR, AKD, and BMA techniques for post-processing  
392 daily and weekly ETo forecasts derived from single or multi-model numerical weather predictions. The different ETo  
393 forecast strategies were compared against the simple linear regression bias correction method using both daily and weekly  
394 forecasts, and also against persistence in the case of weekly forecasts. The probabilistic post-processing techniques largely  
395 modified the spread of the original ETo forecasts, with very favorably impacts on the probabilistic forecast performance. They  
396 corrected the notable under-dispersion and the poor consistency between the spread of the ETo forecasts and the dimension of  
397 the errors, leading to better skill reliability. The adjustments were crucial on the performance of the weekly NCEP  
398 forecasts, followed by the weekly UKMO forecasts, whose bias corrected versions show a clear disadvantage compared with  
399 the strategies that include the ECMWF forecasts.

400 The deterministic forecast performance based on the probabilistic methods were comparable to the linear regression bias  
401 correction for both daily and weekly forecasts, and the skill is about 100% higher than those based on persistence in the case  
402 of the weekly forecasts. The RMSE are between 12 and 20% for the daily totals and 8 and 11% for the weekly totals. The NGR  
403 and AKD provided similar estimates of the first and second order moments of the predictive density distribution; they showed  
404 similar effectiveness, but the NGR method exhibited higher reliability and computational efficiency. Both NGR and AKD  
405 post-processing methods outperformed the BMA method when considering daily forecasts at long lead times.



406 The multi-model forecasting provided benefits at daily scales compared to the ECMWF asting, while the benefits were  
407 marginal at weekly scales. The multi-model ensemble forecasting seems a better choice when the UKMO forecasts are  
408 comparable or slightly better than the ECMWF forecasts, such as at short (1-2 days) lead times and over the southern and  
409 western regions. Post-processing single model forecast is a better choice than post-processing multi-model ensemble forecast  
410 in the circumstances where the ECMWF forecasts perform considerably better than the UKMO and NCEP, such as at mid and  
411 long lead times, especially over the northeastern regions. While we considered a length of the training period of 30 days for  
412 daily post-processing, the increase of the training period to 45 days only led to minimal improvements. In conclusion, our  
413 results suggest that the NGR post-processing of ETo forecasts generated from the ECMWF or ECMWF-UKMO predictions  
414 is the most plausible strategy among those being evaluated, and is recommended for ditional implementations.

#### 415 **Acknowledgement**

416 This research was supported in part by the Alabama Agricultural Experiment Station and the Hatch program of the National  
417 Institute of Food and Agriculture (NIFA), U.S. Department of Agriculture (USDA, Access No. 1012578), by the Auburn  
418 University Intramural Grant Program, by the Auburn University Presidential Awards for Interdisciplinary Research, and by  
419 the USDA-NIFA Agriculture and Food Research Initiative (AFRI) competitive grant.

#### 420 **Code/Data availability**

421 Request for materials should be addressed to Di Tian.

#### 422 **Author contributions**

423 HM and T designed and conceptualized the research. HM implemented the design, performed data curation, analysis,  
424 validation, visualization, and wrote the original draft. DT supervised the research, contributed by advice, and reviewed and  
425 edited the manuscript.

#### 426 **Competing interests**

427 The authors declare that they have no conflict of interest.

#### 428 **References**

429 Allen, R. G., Pereira, L. S., Raes, D. and Smith, M.: Crop evapotranspiration-Guidelines for computing crop water  
430 requirements-FAO, Irrigation and drainage paper 56, Fao, Rome, 300(9), p.D05109, 1998.



- 431 Archambeau, C., Lee, J. A. and Verleysen, M.: On Convergence Problems of the EM Algorithm for Finite Gaussian Mixtures,  
432 In ESANN (Vol. 3, pp. 99-106), 2003.
- 433 Baldauf, M., Seifert, A., Förstner, J., Majewski, D., Raschendorfer, M. and Reinhardt, T.: Operational convective-scale  
434 numerical weather prediction with the COSMO model: Description and sensitivities, *Monthly Weather Review*, 139(12),  
435 pp.3887-3905, 2011.
- 436 Bauer, P., Thorpe, A. and Brunet, G.: The quiet revolution of numerical weather prediction, *Nature*, 525(7567): 47-55, 2015.
- 437 Bentzien, S. and Friederichs, P.: Generating and calibrating probabilistic quantitative precipitation forecasts from the high-  
438 resolution NWP model COSMO-DE. *Weather and Forecasting*, 27(4), pp.988-1002, 2012.
- 439 Beran, R. and Hall, P.: Interpolated nonparametric prediction intervals and confidence intervals, *Journal of the Royal Statistical*  
440 *Society, Series B (Methodological)*, pp.643-652, 1993.
- 441 Bröcker, J. and Smith, L. A.: From ensemble forecasts to predictive distribution functions, *Tellus A: Dynamic Meteorology*  
442 *and Oceanography*, 60(4), pp.663-678, 2008.
- 443 Buizza, R., Houtekamer, P. L., Pellerin, G., Toth, Z., Zhu, Y. and Wei, M.: A comparison of the ECMWF, MSC, and NCEP  
444 global ensemble prediction systems, *Monthly Weather Review*, 133(5), pp.1076-1097, 2005.
- 445 Casella, G. and Berger, R. L. : *Statistical inference (Vol. 2)*. Pacific Grove, CA: Duxbury, 2002.
- 446 Castro, F. X., Tudela, A. and Sebastià, M. T.: Modeling moisture content in shrubs to predict fire risk in Catalonia (Spain).  
447 *Agricultural and Forest Meteorology*, 116(1-2), pp.49-59, 2003.
- 448 Chirico, G. B., Pelosi, A., De Michele, C., Bolognesi, S. F. and D'Urso, G.: Forecasting potential evapotranspiration by  
449 combining numerical weather predictions and visible and near-infrared satellite images: an application in southern Italy, *The*  
450 *Journal of Agricultural Science*, pp.1-9. <https://doi.org/10.1017/S0021859618000084>, 2018.
- 451 Fraley, C., Raftery, A. E. and Gneiting, T.: Calibrating multimodelmulti-model forecast ensembles with exchangeable and  
452 missing members using Bayesian model averaging, *Monthly Weather Review*, 138(1), pp.190-202, 2010.
- 453 Fraley, C., Raftery, A. E., Slougher, J. M., Gneiting T.: EnsembleBMA: Probabilistic Forecasting using Ensembles and  
454 Bayesian Model Averaging. R package version 5.1.3. <https://CRAN.R-project.org/package=ensembleBMA>, 2016.
- 455 Glahn, H. R. and Lowry, D. A.: The use of model output statistics (MOS) in objective weather forecasting. *J Appl Meteorol*,  
456 11(8): 1203-1211, 1972.
- 457 Glahn, H. R. and Ruth, D. P.: The new digital forecast database of the National Weather Service, *Bulletin of the American*  
458 *Meteorological Society*, 84(2), pp.195-202, 2003.
- 459 Gneiting, T., Raftery, A. E., Westveld III, A. H. and Goldman, T.: Calibrated probabilistic forecasting using ensemble model  
460 output statistics and minimum CRPS estimation, *Monthly Weather Review*, 133(5), 1098-1118., 2005.
- 461 Gneiting, T.: Calibration of medium-range weather forecasts, *European Centre for Medium-Range Weather Forecasts*,  
462 *Technical Memorandum No. 71*, 2014.
- 463 Hagedorn, R., Buizza, R., Hamill, T. M., Leutbecher, M. and Palmer, T. N.: Comparing TIGGE multimodelmulti-model  
464 forecasts with reforecast-calibrated ECMWF ensemble forecasts. *Q J Roy Meteor Soc*, 138(668): 1814-1827, 2012.





- 465 Hamill, T. M. and Colucci, S. J.: Verification of Eta–RSM short-range ensemble forecasts, *Monthly Weather Review*, 125(6),  
466 pp.1312-1327, 1997.
- 467 Hamill, T. M. and Whitaker, J. S.: Probabilistic quantitative precipitation forecasts based on reforecast analogs: Theory and  
468 application, *Mon Weather Rev*, 134(11): 3209-3229, 2006.
- 469 Hamill, T. M. et al.: Noaa's Second-Generation Global Medium-Range Ensemble Reforecast Dataset. *B Am Meteorol Soc*,  
470 94(10): 1553-1565, 2013.
- 471 Hobbins, M., McEvoy, D. and Hain, C.: Evapotranspiration, evaporative demand, and drought, *Drought and Water Crises: Science, Technology, and Management Issues*, pp.259-288, 2017.
- 472
- 473 Hong, S. Y. and Dudhia, J.: Next-generation numerical weather prediction: Bridging parameterization, explicit clouds, and  
474 large eddies, *Bulletin of the American Meteorological Society*, 93(1), pp.ES6-ES9., 2012.
- 475 Ishak, A. M., Bray, M., Remesan, R. and Han, D.: Estimating reference evapotranspiration using numerical weather modelling,  
476 *Hydrological processes*, 24(24), pp.3490-3509, 2010.
- 477 Klein, W. H. and Glahn, H. R.: Forecasting local weather by means of model output statistics, *Bulletin of the American*  
478 *Meteorological Society*, 55(10), pp.1217-1227, 1974.
- 479 Landaras, G., Ortiz-Barredo, A. and López, J. J.: Forecasting weekly evapotranspiration with ARIMA and artificial neural  
480 network models, *Journal of irrigation and drainage engineering*, 135(3), pp.323-334, 2009.
- 481 Leutbecher, M. and Palmer, T. N.: Ensemble forecasting, *Journal of Computational Physics*, 227(7), pp.3515-3539, 2008.
- 482 Mase, A. S. and Prokopy, L. S.: Unrealized potential: A review of perceptions and use of weather and climate information in  
483 agricultural decision making, *Weather, Climate, and Society*, 6(1), pp.47-61, 2014.
- 484 Medina, H., Tian, D., Marin, F. R. and Chirico, G. B.: Comparing GEFS, ECMWF, and Postprocessing Methods for Ensemble  
485 Precipitation Forecasts over Brazil, *Journal of Hydrometeorology*, 20(4), pp.773-790, 2019.
- 486 Medina, H., Tian, D., Srivastava, P., Pelosi, A. and Chirico, G. B.: Medium-range reference evapotranspiration forecasts for  
487 the contiguous United States based on multimodelmulti-model numerical weather predictions, *Journal of Hydrology*, 562,  
488 pp.502-517, 2018.
- 489 Mohan, S. and Arumugam, N.: Forecasting weekly reference crop evapotranspiration series, *Hydrological sciences journal*,  
490 40(6), pp.689-702, 1995.
- 491 National Research Council of the National Academies: *Completing the Forecast: Characterizing and Communicating*  
492 *Uncertainty for Better Decisions Using Weather and Climate Forecasts*, The National Academies Press, 124 pp, 2006:
- 493 Pelosi, A., Medina, H., Van den Bergh, J., Vannitsem, S., and Chirico, G. B.: Adaptive Kalman filtering for post-processing  
494 ensemble numerical weather predictions, *Mon Weather Rev*, doi.org/10.1175/MWR-D-17-0084., 2017.
- 495 Pelosi, A., Medina, H., Villani, P., D'Urso, G. and Chirico, G. B.: Probabilistic forecasting of reference evapotranspiration  
496 with a limited area ensemble prediction system, *Agricultural water management*, 178, pp.106-118, 2016.
- 497 Perera, K. C., Western, A. W., Nawarathna, B. and George, B.: Forecasting daily reference evapotranspiration for Australia  
498 using numerical weather prediction outputs, *Agr Forest Meteorol*, 194: 50-63, 2014.



- 499 Prokopy, L. S., Haigh, T., Mase, A. S., Angel, J., Hart, C., Knutson, C., Lemos, M. C., Lo, Y. J., McGuire, J., Morton, L. W.  
500 and Perron, J.: Agricultural advisors: a receptive audience for weather and climate information?, *Weather, Climate, and*  
501 *Society*, 5(2), pp.162-167, 2013.
- 502 R Core Team: R: A language and environment for statistical computing, R Foundation for Statistical Computing, Vienna,  
503 Austria, <http://www.R-project.org/>, 2014.
- 504 Raftery, A. E., Gneiting, T., Balabdaoui, F. and Polakowski, M.: Using Bayesian model averaging to calibrate forecast  
505 ensembles, *Monthly Weather Review*, 133(5), pp.1155-1174, 2005.
- 506 Rodriguez-Iturbe, I., Porporato, A., Ridolfi, L., Isham, V. and Coxi, D. R.: Probabilistic modelling of water balance at a point:  
507 the role of climate, soil and vegetation, *Proceedings of the Royal Society of London, Series A: Mathematical, Physical and*  
508 *Engineering Sciences*, 455(1990), pp.3789-3805, 1999.
- 509 Roulston, M. S. and Smith, L. A.: Combining dynamical and statistical ensembles, *Tellus A: Dynamic Meteorology and*  
510 *Oceanography*, 55(1), pp.16-30, 2003.
- 511 Seity, Y., Brousseau, P., Malardel, S., Hello, G., Bénard, P., Bouttier, F., Lac, C. and Masson, V.: The AROME-France  
512 convective-scale operational model, *Monthly Weather Review*, 139(3), pp.976-991, 2011.
- 513 Siegert, S.: SpecsVerification: Forecast Verification Routines for Ensemble Forecasts of Weather and Climate. R package  
514 version 0.5-2. <https://CRAN.R-project.org/package=SpecsVerificatio>, 2017.
- 515 Silva, D., Meza, F. J. and Varas, E.: Estimating reference evapotranspiration (ET<sub>o</sub>) using numerical weather forecast data in  
516 central Chile, *Journal of hydrology*, 382(1-4), pp.64-71, 2010.
- 517 Swinbank, R. et al.: The Tigge Project and Its Achievements. *B Am Meteorol Soc*, 97(1): 49-67, 2016.
- 518 Tian, D. and Martinez, C. J.: Comparison of two analog-based downscaling methods for regional reference evapotranspiration  
519 forecasts, *J Hydrol*, 475: 350-364, 2012a
- 520 Tian, D. and Martinez, C. J.: Forecasting Reference Evapotranspiration Using Retrospective Forecast Analogs in the  
521 Southeastern United States, *J Hydrometeorol*, 13(6): 1874-1892, 2012b
- 522 Tian, D. and Martinez, C. J.: The GEFS-based daily reference evapotranspiration (ET<sub>o</sub>) forecast and its implication for water  
523 management in the southeastern United States. *J Hydrometeorol*, 15(3): 1152-1165, 2014.
- 524 Tian, X., Xie, Z., Wang, A. and Yang, X.: A new approach for Bayesian model averaging, *Science China Earth Sciences*,  
525 55(8), 1336-1344, 2012.
- 526 Toth, Z., Talagrand, O., Candille, G. and Zhu, Y.: Probability and ensemble forecasts, *Forecast Verification: A Practitioner's*  
527 *Guide in Atmospheric Science*, pp.137-163, 2003.
- 528 Vrugt, J. A., Diks, C. G. and Clark, M. P.: Ensemble Bayesian model averaging using Markov chain Monte Carlo sampling,  
529 *Environmental fluid mechanics*, 8(5-6), pp.579-595, 2008.
- 530 Wang, X. and Bishop, C. H.: Improvement of ensemble reliability with a new dressing kernel, *Quarterly Journal of the Royal*  
531 *Meteorological Society: A journal of the atmospheric sciences, applied meteorology and physical oceanography*, 131(607),  
532 pp.965-986, 2005.

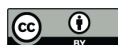

- 533 Wilks, D. S. and Hamill, T. M.: Comparison of ensemble-MOS methods using GFS reforecasts, *Monthly Weather Review*,  
534 135(6), pp.2379-2390, 2007.
- 535 Wilks, D. S.: *Statistical methods in the atmospheric sciences*, (Vol 100), Academic press, 2011.
- 536 Wilson, L. J., Beauregard, S., Raftery, A. E. and Verret, R.: Calibrated surface temperature forecasts from the Canadian  
537 ensemble prediction system using Bayesian model averaging, *Monthly Weather Review*, 135(4), pp.1364-1385, 2007.
- 538 Yuen, R., Baran, S., Fraley, C., Gneiting, T., Lerch, S., Scheuerer, M., and Thorarinsdottir, T.: ensembleMOS: Ensemble  
539 Model Output Statistics. R package version 0.8.2. <https://CRAN.R-project.org/package=ensembleMOS>, 2018.
- 540 Zhao, T., Wang, Q. J. and Schepen, A.: A Bayesian modelling approach to forecasting short-term reference crop  
541 evapotranspiration from GCM outputs, *Agricultural and Forest Meteorology*, 269, pp.88-101, 2019.
- 542
- 543
- 544
- 545
- 546
- 547
- 548
- 549
- 550
- 551
- 552
- 553
- 554
- 555
- 556

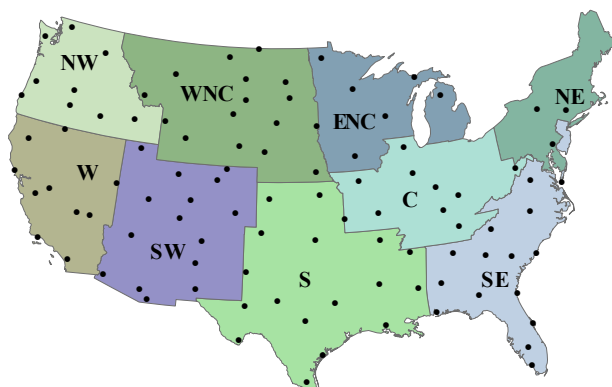

557

558 Figure 1. U.S. climate regions: NW (North West), WNC (West North Central), ENC (East North Central), NE (North East),  
559 C (Central), SE (South East), C (Central), S (South), SW (South West), W (West). The circles represent the sampled USCRN  
560 stations in the experiment.

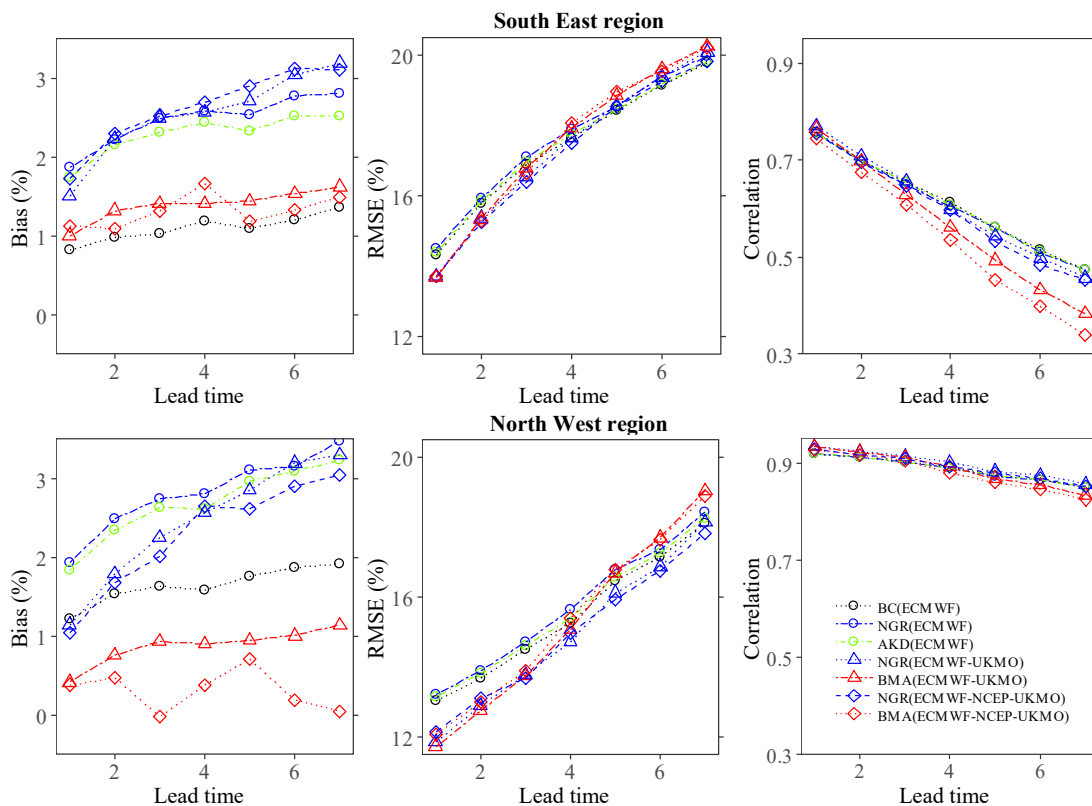

Figure 2. Relative ME, RMSE, and correlation for different lead times over the SE and NW regions.

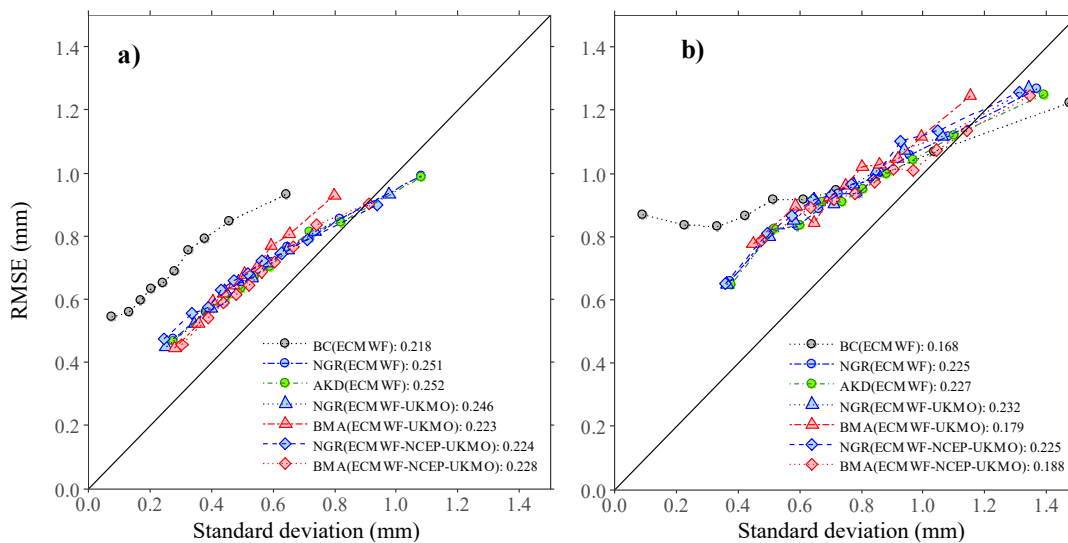

Figure 3. Binned spread-skill plots using all pairs of forecasts and observations at a) 1-day and b) 7-day lead. The correlation between the standard deviations and the absolute errors is reported after the colon. The solid line represents the 1:1 relationship.

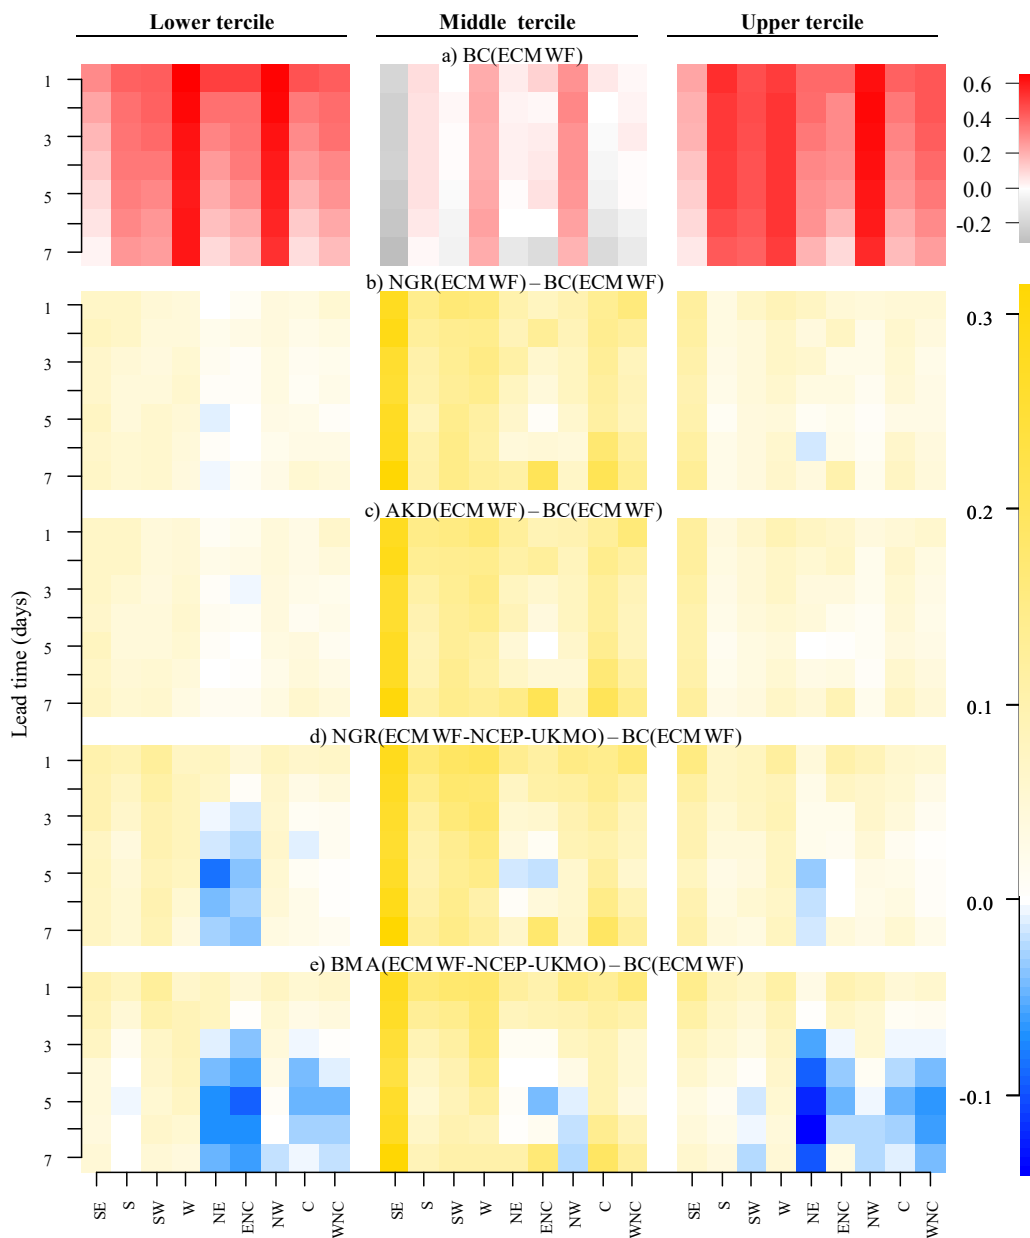

Figure 4. a) BSS of the ECMWF forecasts post-processed using simple bias correction (used as reference BSS values) and b- e) differences between the BSS of the ECMWF forecasts post-processed with the b) NGR and c) AKD methods and the ECMWF-NCEP-UKMO forecasts post-processed with the d) NGR and e) BMA methods and the reference BSS.



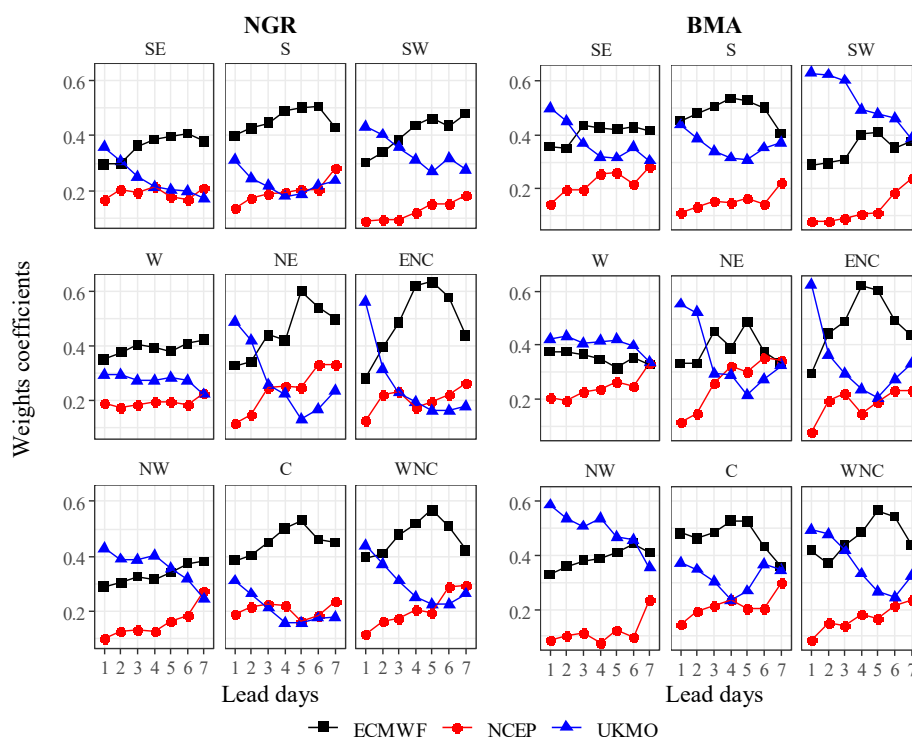

Figure 5. Regional mean weight coefficient  $b$  of the NGR technique (left panel) and the weight coefficient  $w$  of the BMA technique (right panel) for the post-processed ECMWF-NCEP-UKMO forecasts at different lead days.

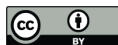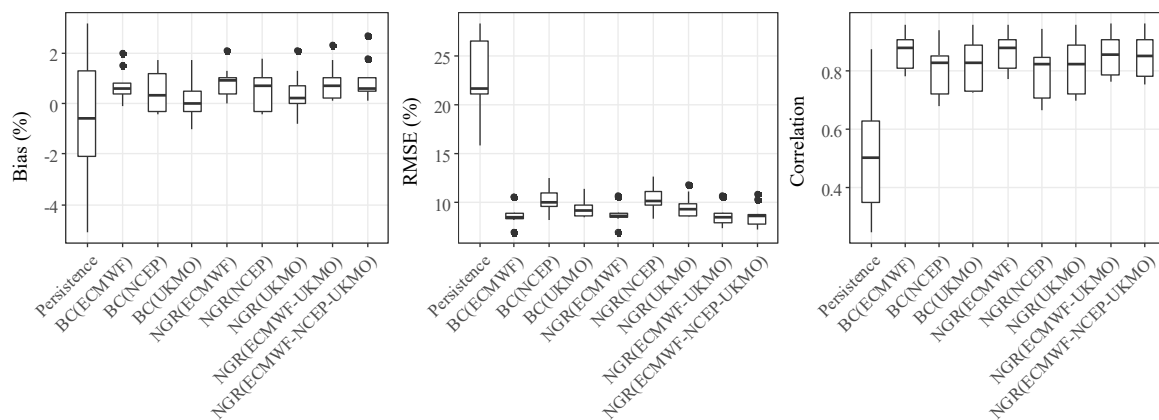

Figure 6. Relative bias, relative RMSE and correlation of weekly forecasts

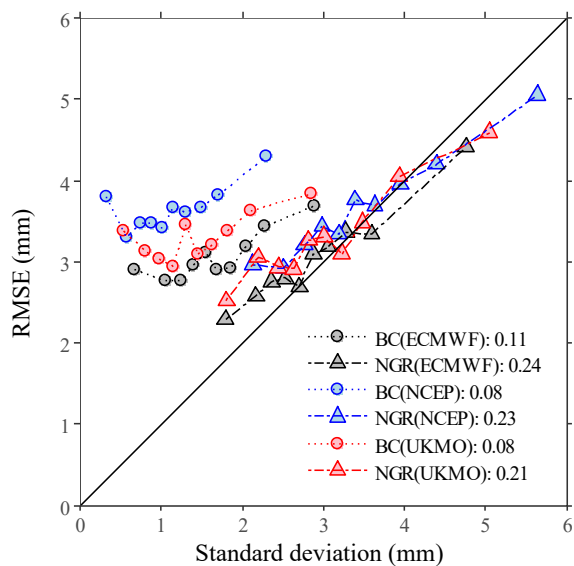

Figure 7. Binned spread-skill plot for the weekly forecasts using all pairs of forecasts and observations. The correlation between the standard deviations and the absolute errors is reported after the colon. The solid line represents the 1:1 relationship.

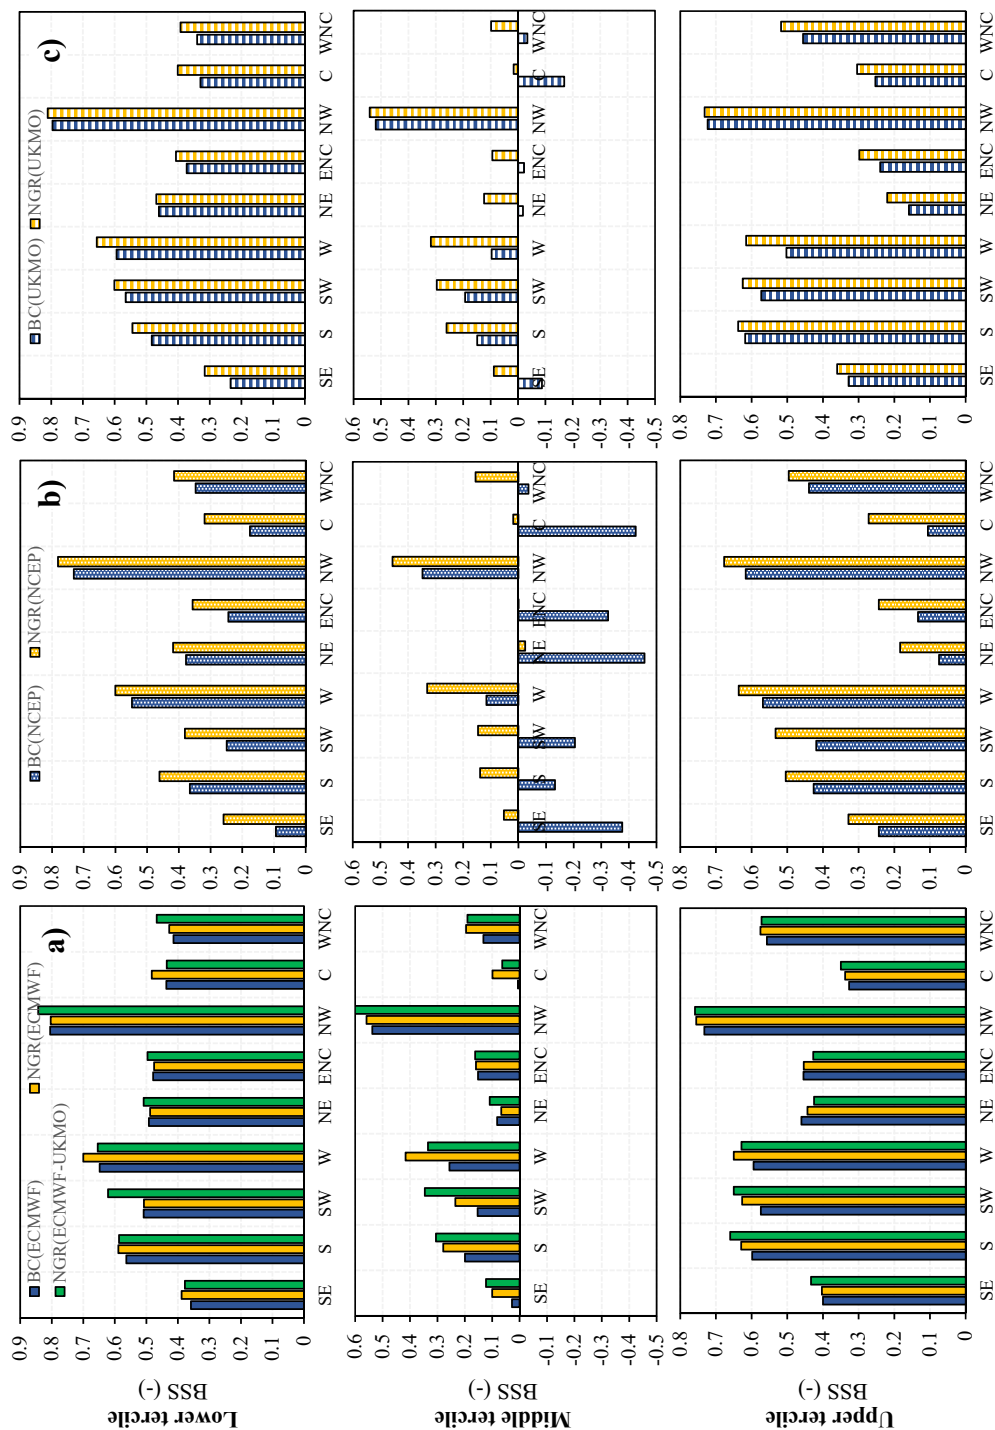

Figure 8. Comparison between BC and NGR based Brier Skill Scores considering a) ECMWF and ECMWF-UKMO forecasts, b) NCEP, and c) UKMO forecasts.



Table 1. Evaluated schemes for daily and weekly ETo forecasts, with different post-processing methods: BC (simple bias correction), NGR (nonhomogeneous Gaussian regression), AKD (affine kernel dressing), and BMA (Bayesian model averaging), and different model and ensemble schemes: ECMWF (European Centre for Medium-Range Weather Forecasts model), NCEP (National Centers for Environmental Prediction model), and UKMO (United Kingdom Meteorological office model), ECMWF-UKMO (ensemble of ECMWF and UKMO), ECMWF-NCEP-UKMO (ensemble of ECMWF, NCEP, and UKMO).

| Persistence | BC    |      |      | NGR   |      |      |            | AKD             | BMA   |            |                 |
|-------------|-------|------|------|-------|------|------|------------|-----------------|-------|------------|-----------------|
|             | ECMWF | NCEP | UKMO | ECMWF | NCEP | UKMO | ECMWF-UKMO | ECMWF-NCEP-UKMO | ECMWF | ECMWF-UKMO | ECMWF-NCEP-UKMO |
| Daily       | ✓     |      |      | ✓     |      |      | ✓          | ✓               |       | ✓          | ✓               |
| Weekly      | ✓     | ✓    | ✓    | ✓     | ✓    | ✓    | ✓          | ✓               |       |            |                 |



Table 2. Minimum, mean and maximum coverage ratios over all the climate regions and lead times for different methods. See the caption of Table 1 for explanations of the methods acronyms.

|                        | BC<br>ECMWF | NGR<br>ECMWF | AKD<br>ECMWF | NGR<br>ECMWF-UKMO | BMA<br>ECMWF-UKMO | NGR<br>ECMWF-NCEP-UKMO | BMA<br>ECMWF-NCEP-UKMO |
|------------------------|-------------|--------------|--------------|-------------------|-------------------|------------------------|------------------------|
| Minimum coverage ratio | 49.69       | 94.27        | 94.69        | 93.23             | 94.38             | 92.60                  | 91.35                  |
| Mean coverage ratio    | 76.67       | 95.73        | 96.25        | 94.90             | 96.98             | 94.38                  | 96.88                  |
| Maximum coverage ratio | 93.13       | 98.02        | 98.33        | 97.29             | 99.38             | 96.56                  | 99.58                  |



Table 3. Spatial weighted average values of daily forecast metrics over all climate regions for different methods at lead days 1 and 7. See the caption of Table 1 for explanations of the methods acronyms. Numbers in bold indicate the best performance for each lead day.

|                              | BC    |              | NGR   |              | AKF   |              | NGR          |        | BMA          |        | NGR          |        | BMA          |              |
|------------------------------|-------|--------------|-------|--------------|-------|--------------|--------------|--------|--------------|--------|--------------|--------|--------------|--------------|
|                              | ECMWF | ECMWF        | ECMWF | ECMWF        | ECMWF | ECMWF        | ECMWF        | ECMWF  | ECMWF        | ECMWF  | ECMWF        | ECMWF  | ECMWF        | ECMWF        |
|                              | 1 day | 7 days       | 1 day | 7 days       | 1 day | 7 days       | 1 day        | 7 days | 1 day        | 7 days | 1 day        | 7 days | 1 day        | 7 days       |
| rBias (%)                    | 0.822 | 1.203        | 1.695 | 2.682        | 1.626 | 2.419        | 1.327        | 2.735  | 0.632        | 0.939  | 1.394        | 2.778  | <b>0.490</b> | <b>0.626</b> |
| rRMSE (%)                    | 14.38 | <b>19.64</b> | 14.59 | 19.88        | 14.47 | 19.76        | 13.68        | 19.67  | 13.65        | 20.15  | <b>13.59</b> | 19.67  | 13.67        | 20.28        |
| Bias (mm day <sup>-1</sup> ) | 0.038 | 0.057        | 0.080 | 0.128        | 0.077 | 0.115        | 0.063        | 0.131  | 0.029        | 0.046  | 0.067        | 0.134  | 0.005        | 0.006        |
| RMSE (mm day <sup>-1</sup> ) | 0.708 | 0.950        | 0.718 | 0.961        | 0.716 | 0.958        | 0.682        | 0.965  | 0.681        | 0.990  | 0.681        | 0.971  | 0.685        | 1.002        |
| Correlation                  | 0.832 | <b>0.652</b> | 0.829 | 0.649        | 0.830 | 0.649        | <b>0.843</b> | 0.639  | 0.841        | 0.586  | 0.841        | 0.635  | 0.832        | 0.560        |
| Coverage ratio               | 64.54 | 79.40        | 95.63 | 95.44        | 95.93 | 96.10        | 94.24        | 94.73  | <b>96.51</b> | 96.56  | 93.52        | 94.57  | 96.47        | <b>97.24</b> |
| BSS_1st                      | 0.442 | 0.232        | 0.492 | 0.279        | 0.492 | <b>0.282</b> | <b>0.525</b> | 0.274  | 0.519        | 0.240  | 0.521        | 0.271  | 0.513        | 0.225        |
| BSS_2nd                      | 0.042 | -0.062       | 0.201 | 0.101        | 0.202 | <b>0.101</b> | <b>0.224</b> | 0.095  | 0.214        | 0.074  | 0.217        | 0.089  | 0.200        | 0.059        |
| BSS_3rd                      | 0.433 | 0.300        | 0.496 | <b>0.359</b> | 0.499 | 0.358        | <b>0.519</b> | 0.350  | 0.515        | 0.305  | 0.512        | 0.338  | 0.494        | 0.277        |





Table 4. Percentage differences (averaged over all lead times) of the ECMWF-UKMO and ECMWF-NCEP-UKMO forecast performance with the ECMWF forecast performance, after post-processing with the non-homogeneous Gaussian regression (NGR) method. See the caption of Table 1 for explanations of the forecast models acronyms.

|             | Western climate regions |                 |            |                 |            |                 | Northern climate regions |                 |            |                 |            |                 |         |         |
|-------------|-------------------------|-----------------|------------|-----------------|------------|-----------------|--------------------------|-----------------|------------|-----------------|------------|-----------------|---------|---------|
|             | SW                      |                 | W          |                 | NW         |                 | NE                       |                 | ENC        |                 | WNC        |                 |         |         |
|             | ECMWF-UKMO              | ECMWF-NCEP-UKMO | ECMWF-UKMO | ECMWF-NCEP-UKMO | ECMWF-UKMO | ECMWF-NCEP-UKMO | ECMWF-UKMO               | ECMWF-NCEP-UKMO | ECMWF-UKMO | ECMWF-NCEP-UKMO | ECMWF-UKMO | ECMWF-NCEP-UKMO |         |         |
| Bias        | -26.753                 | -30.826         | -9.111     | 9.421           | -13.908    | -18.800         | -4.268                   | 1.898           | 4.333      | 25.053          | -2.149     | -1.445          | -10.119 | 0.761   |
| RMSE        | -4.682                  | -4.013          | -3.455     | -2.505          | -3.973     | -2.839          | 1.898                    | 4.333           | 4.333      | 2.000           | 1.455      | 2.000           | -1.313  | -0.922  |
| Correlation | 1.760                   | 0.627           | 0.947      | 0.707           | 1.19       | 0.607           | -4.180                   | -4.600          | -4.600     | -3.275          | -3.275     | -3.137          | -2.312  | -2.062  |
| Cov. ratio  | -1.386                  | -2.094          | -0.977     | -1.194          | -1.019     | -1.144          | -0.835                   | -1.656          | -1.656     | -0.850          | -0.850     | -0.986          | -0.835  | -1.402  |
| BSS_1st     | 12.022                  | 7.481           | 3.222      | 2.846           | 3.548      | 4.236           | -11.999                  | -9.676          | -9.676     | -9.643          | -9.643     | -9.384          | -3.680  | -5.181  |
| BSS_2nd     | 8.991                   | -6.504          | 5.792      | 9.044           | 4.984      | 3.961           | -112.954                 | -93.092         | -93.092    | -19.092         | -19.092    | -13.642         | -15.725 | -27.949 |
| BSS_3nd     | 2.295                   | -1.807          | 3.575      | 6.557           | 4.196      | 2.370           | -9.105                   | -8.992          | -8.992     | -6.420          | -6.420     | -10.605         | -4.595  | -5.835  |



Table 5. Percentage differences (averaged over regions) of forecast performance of using 45 days training period with using 30 days training period for lead days 1 and 7. See the caption of Table 1 for explanations of the methods acronyms.

|             | NGR(ECMWF) |        | AKD(ECMWF) |        | NGR(ECMWF-UKMO) |        | NGR(ECMWF-NCEP-UKMO) |        |
|-------------|------------|--------|------------|--------|-----------------|--------|----------------------|--------|
|             | 1 day      | 7 days | 1 day      | 7 days | 1 day           | 7 days | 1 day                | 7 days |
| Bias        | 16.569     | 18.732 | 21.654     | 22.859 | 4.714           | 10.089 | -0.496               | 7.070  |
| RMSE        | -0.701     | -2.641 | -1.007     | -3.121 | -0.404          | -3.720 | -0.045               | -4.742 |
| Correlation | -0.157     | 0.525  | -0.141     | 0.605  | -0.099          | 1.332  | -0.467               | 0.741  |
| Cov. Ratio  | 1.276      | 0.954  | 1.615      | 1.257  | 1.701           | 1.495  | 1.938                | 1.338  |
| BSS_1st     | -0.884     | 2.183  | -1.164     | 2.761  | -0.212          | 5.062  | -2.600               | 6.277  |
| BSS_2nd     | -1.259     | 2.764  | -1.283     | 5.680  | 3.614           | 8.959  | -2.293               | 5.562  |
| BSS_3nd     | -0.382     | -1.589 | -0.904     | -0.212 | -1.340          | 2.632  | -1.625               | 0.240  |



5 Table 6. Spatial weighted average values of weekly forecast metrics over all climate regions. See the caption of Table 1 for explanations of the methods acronyms.

|                               | Persistence | BC    |        |       | NGR   |        |       |            |                 |
|-------------------------------|-------------|-------|--------|-------|-------|--------|-------|------------|-----------------|
|                               |             | ECMWF | NCEP   | UKMO  | ECMWF | NCEP   | UKMO  | ECMWF-UKMO | ECMWF-NCEP-UKMO |
| rBias (%)                     | -0.288      | 0.683 | 0.296  | 0.097 | 0.846 | 0.496  | 0.305 | 0.764      | 0.814           |
| rRMSE (%)                     | 22.108      | 8.872 | 10.453 | 9.460 | 8.952 | 10.571 | 9.599 | 8.753      | 8.661           |
| Bias (mm week <sup>-1</sup> ) | -0.086      | 0.217 | 0.077  | 0.007 | 0.277 | 0.145  | 0.080 | 0.246      | 0.268           |
| RMSE (mm week <sup>-1</sup> ) | 7.541       | 3.059 | 3.634  | 3.306 | 3.086 | 3.675  | 3.353 | 3.059      | 3.064           |
| Correlation                   | 0.530       | 0.872 | 0.806  | 0.835 | 0.870 | 0.801  | 0.829 | 0.863      | 0.856           |
| Coverage (%)                  |             | 78.40 | 48.07  | 62.92 | 99.29 | 98.58  | 98.13 | 97.74      | 97.40           |
| BSS_1st                       |             | 0.508 | 0.326  | 0.448 | 0.529 | 0.430  | 0.501 | 0.547      | 0.506           |
| BSS_2nd                       |             | 0.164 | -0.147 | 0.069 | 0.238 | 0.150  | 0.204 | 0.255      | 0.225           |
| BSS_3nd                       |             | 0.528 | 0.371  | 0.468 | 0.553 | 0.461  | 0.515 | 0.558      | 0.550           |
